# Supplementary material for: Kinetic approach to hyper-doped optical quality thin films
Source: Royal Society of Chemistry journal article supplement (doi:10.1039/c4cc01746c), 2014-01-01
Supplement: c4cc01746c1.pdf [file c4cc01746c1.pdf]

#### Sol-Gel Materials:

Tetraethyl orthosilicate (TEOS): 99.999% - Aldrich  
Millipore water: 17.7-17.8 – Barnstead Epure  
Ethanol – 95% - Aaper Alcohol  
Phosphoric Acid: 85% - EMD

#### Sol-Gel Preparation:

In a 2 mL micro centrifuge tube: ethanol, then TEOS, then water, then 1%  $\text{H}_3\text{PO}_4$  were combined. They were mixed with a vortexer, tightly sealed, and stored in the dark to gel (18-20 hours). Volumes were delivered with micropipettes and are as follows:

|                            |                     |
|----------------------------|---------------------|
| Ethanol                    | 633.8 $\mu\text{L}$ |
| TEOS                       | 317.5 $\mu\text{L}$ |
| Millipore Water            | 180.0 $\mu\text{L}$ |
| 1% $\text{H}_3\text{PO}_4$ | 3.51 $\mu\text{L}$  |

#### Thin Film Preparation/ Spin Coating:

After the 18-20 hours of time allotted for the sol to gel, the sol-gel was mixed again prior to thin film preparation. Using a micropipette, 80  $\mu\text{L}$  of sol-gel was delivered onto a 25 × 25 mm cover slip (Fisherfinest Premium Cover Glass) and spin coated into a thin film at 6100 rpm for 110 seconds.

Spin Coater: Laurell Technologies – Model WS-400A-6NPP/LITE

Cover Slip Preparation: Acetone wash, 5 × Millipore rinse, 10% NaOH wash, 5 × Millipore rinse, Store in Millipore water. During each washing the cover slips are sonicated for 30 minutes. On fifth rinse, cover slips are sonicated for 5 minutes prior to next washing step.

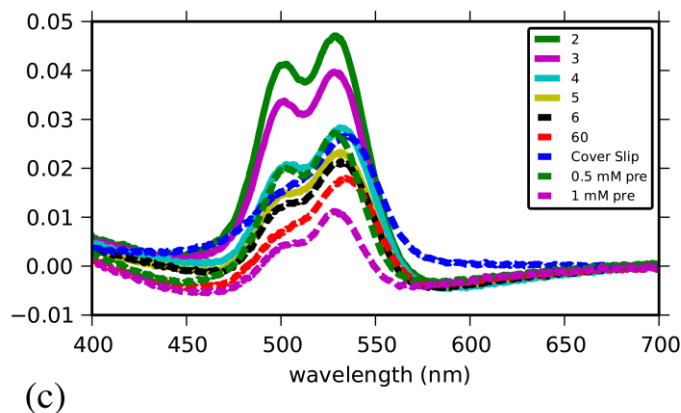

**Fig. 2 (c)** Shown above are the absorption spectra for the longer post spin coating delay samples; post doped cover slip, and pre doped thin films which were overlapped in Figure 2 (a). Interestingly, the ratio Dimer/Monomer decreases with post spin coating delay.

#### Preliminary Profilometry Measurements for Film Thickness:

Thin films were prepared as above, subjected to controlled PSCD, submerged in aqueous solution, subsequently removed and blown dry. Using a razor blade, a strip of gel was then removed from the thin films in a “snow plow” fashion. Using a XP-2 stylus Profilometer by Ambios Technology the step height was then measured. The scan speed was 0.05 mm/s with a measured length of 0.8 mm, the applied force was 0.5 mg, and the range was 10  $\mu\text{m}$ . Samples were usually measured the same day of preparation. Each thickness was the average of quadruple measurements taken from 2 different spots yielding a total of 8 values per film. The average thickness was determined to be  $190 \pm 10$  nm.

**Calculations: Relative increases in doping and approximate concentration.**

The degree of relative doping was determined by calculating the ratio of R6G loaded in a kinetically-doped film to that in a pre-doped film prepared from a liquid sol containing 0.5 mM R6G. Molar extinction coefficients ( $\epsilon$ ) for R6G monomer and dimer at 500 nm and 531 nm are estimated from references 1. Calculations are based on the following parameters:

$$\begin{aligned}\epsilon_{\text{monomer}}^{(500)} &= 30,000 \text{ M}^{-1} \text{ cm}^{-1} & \epsilon_{\text{monomer}}^{(531)} &= 78,300 \text{ M}^{-1} \text{ cm}^{-1} \\ \epsilon_{\text{dimer}}^{(500)} &= 94,000 \text{ M}^{-1} \text{ cm}^{-1} & \epsilon_{\text{dimer}}^{(531)} &= 31,000 \text{ M}^{-1} \text{ cm}^{-1} \\ A_{500}^{\text{kinetically-doped}} &= 0.8875 & A_{531}^{\text{kinetically-doped}} &= 0.6844 & A_{(513)}^{\text{pre-doped}} &= 0.0112\end{aligned}$$

Assumption: pre-doped film thickness = kinetically-doped film thickness =  $l$

$$\text{ratio} = \frac{c_{\text{R6G}}^{\text{kinetically-doped}}}{c_{\text{R6G}}^{\text{pre-doped}}}$$

$$c_{\text{R6G}}^{\text{pre-doped}} = \frac{A_{(513)}^{\text{pre-doped}}}{l \epsilon_{\text{monomer}}^{(513)}} = \frac{0.0112}{(78,300)l} = \frac{1.43 \times 10^{-7}}{l}$$

$$c_{\text{R6G}}^{\text{kinetically-doped}} = c_{\text{monomer}}^{\text{kinetically-doped}} + 2 \times c_{\text{dimer}}^{\text{kinetically-doped}}$$

Given that:

$$\text{At 500 nm: } A_{500}^{\text{kinetically-doped}} = l \epsilon_{\text{monomer}}^{(500)} c_{\text{monomer}}^{\text{kinetically-doped}} + l \epsilon_{\text{dimer}}^{(500)} c_{\text{dimer}}^{\text{kinetically-doped}}$$

$$0.8875 = (30,000)l c_{\text{monomer}}^{\text{kinetically-doped}} + (94,000)l c_{\text{dimer}}^{\text{kinetically-doped}}$$

$$\text{At 531 nm: } A_{531}^{\text{kinetically-doped}} = l \epsilon_{\text{monomer}}^{(531)} c_{\text{monomer}}^{\text{kinetically-doped}} + l \epsilon_{\text{dimer}}^{(531)} c_{\text{dimer}}^{\text{kinetically-doped}}$$

$$0.6844 = (78,300)l c_{\text{monomer}}^{\text{kinetically-doped}} + (31,000)l c_{\text{dimer}}^{\text{kinetically-doped}}$$

Solve for the two linear equations which give:

$$c_{\text{monomer}}^{\text{kinetically-doped}} = \frac{A_{531}^{\text{kinetically-doped}} \epsilon_{\text{dimer}}^{(500)} - A_{500}^{\text{kinetically-doped}} \epsilon_{\text{dimer}}^{(531)}}{(\epsilon_{\text{dimer}}^{(500)} \epsilon_{\text{monomer}}^{(531)} - \epsilon_{\text{dimer}}^{(531)} \epsilon_{\text{monomer}}^{(500)})} = \frac{5.73 \times 10^{-6}}{l}$$

$$c_{\text{dimer}}^{\text{kinetically-doped}} = \frac{A_{500}^{\text{kinetically-doped}} \epsilon_{\text{monomer}}^{(531)} - A_{531}^{\text{kinetically-doped}} \epsilon_{\text{monomer}}^{(500)}}{(\epsilon_{\text{dimer}}^{(500)} \epsilon_{\text{monomer}}^{(531)} - \epsilon_{\text{dimer}}^{(531)} \epsilon_{\text{monomer}}^{(500)})} = \frac{7.61 \times 10^{-6}}{l}$$

$$c_{\text{R6G}}^{\text{kinetically-doped}} = \frac{5.73 \times 10^{-6}}{l} + 2 \times \frac{7.61 \times 10^{-6}}{l} = \frac{2.10 \times 10^{-5}}{l}$$

$$\text{ratio} = \frac{2.10 \times 10^{-5}/l}{1.43 \times 10^{-7}/l} = 146$$

Assuming  $l = 190 \text{ nm}$

$$c_{\text{dimer}}^{\text{kinetically-doped}} = \frac{2.10 \times 10^{-5}}{1.90 \times 10^{-5}} \approx 1,100 \text{ mM}$$

The extinction coefficients are in  $\text{M}^{-1} \text{ cm}^{-1}$ , and the path length of the film thickness in centimeters.<sup>1</sup>

## Leaching Test:

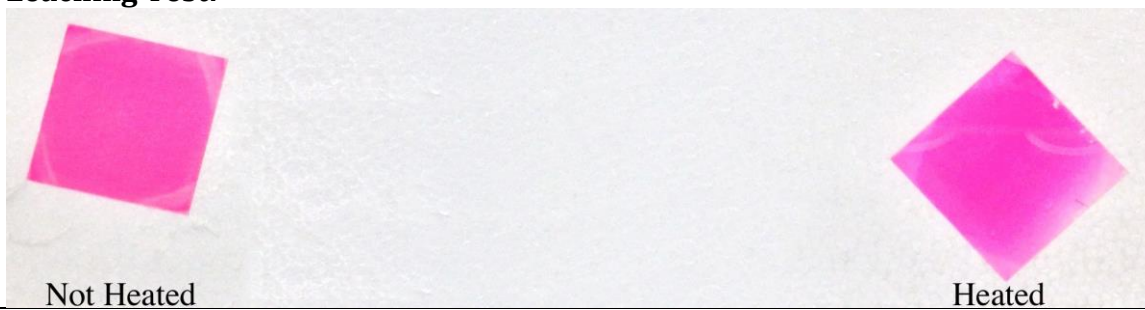

**Fig. 6 (ESI)** Presented above are both the heated and non-heated thin films after 5 days aging. Both had been doped by the developed method prior to aging.

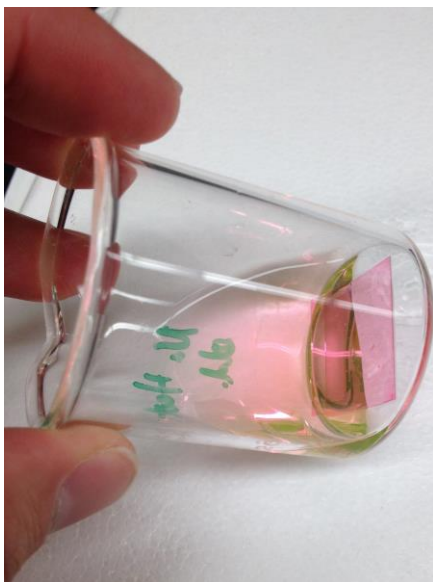

Shown above: Non-heated film after one hour of extraction in water.

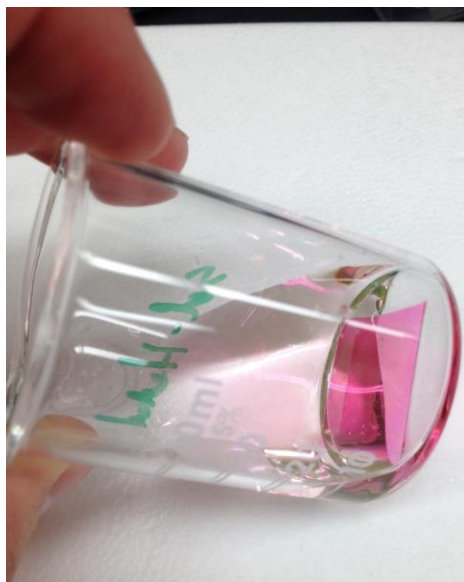

Shown above: Heated film after one hour of extraction in water.

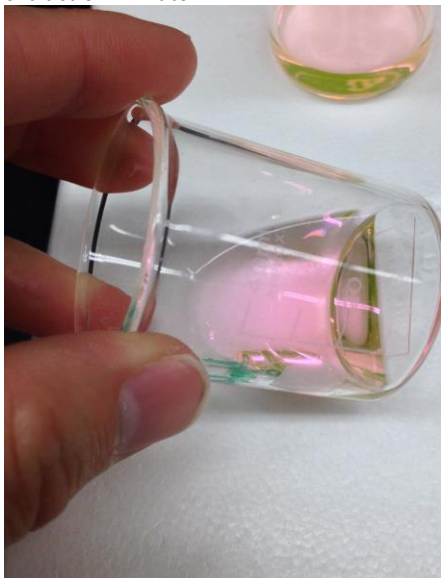

Shown above: Non-heated film after one hour of extraction in ethanol.

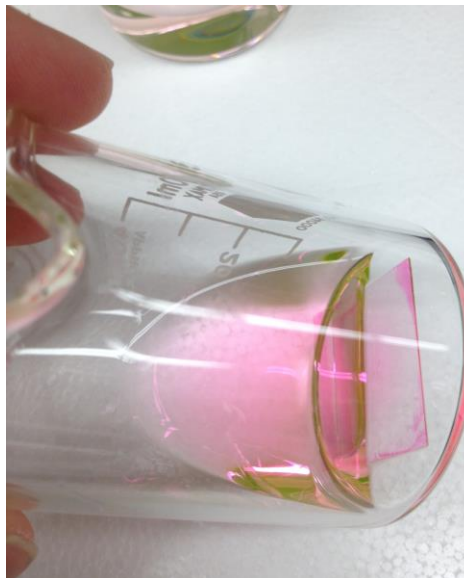

Shown above: Heated film after one hour of extraction in ethanol.

1. (a) J. E. Selwyn and J. I. Steinfeld, *The Journal of Physical Chemistry*, 1972, **76**, 762.  
(b) R. Reisfeld, R. Zusman, Y. Cohen and M. Eyal, *Chemical Physics Letters*, 1988, **147**, 142.
